# Supplementary material for: An Appraisal of Potential for Sowing of Nasturtium officinale into Streams to Mitigate Nutrient Pollution in Eastern Scotland
Source: MDPI journal article supplement (doi:10.3390/ijerph17030895), 2020-01-31

SRP load relative to upstream inlet to ditch (g/d)

Distance down ditch (m)

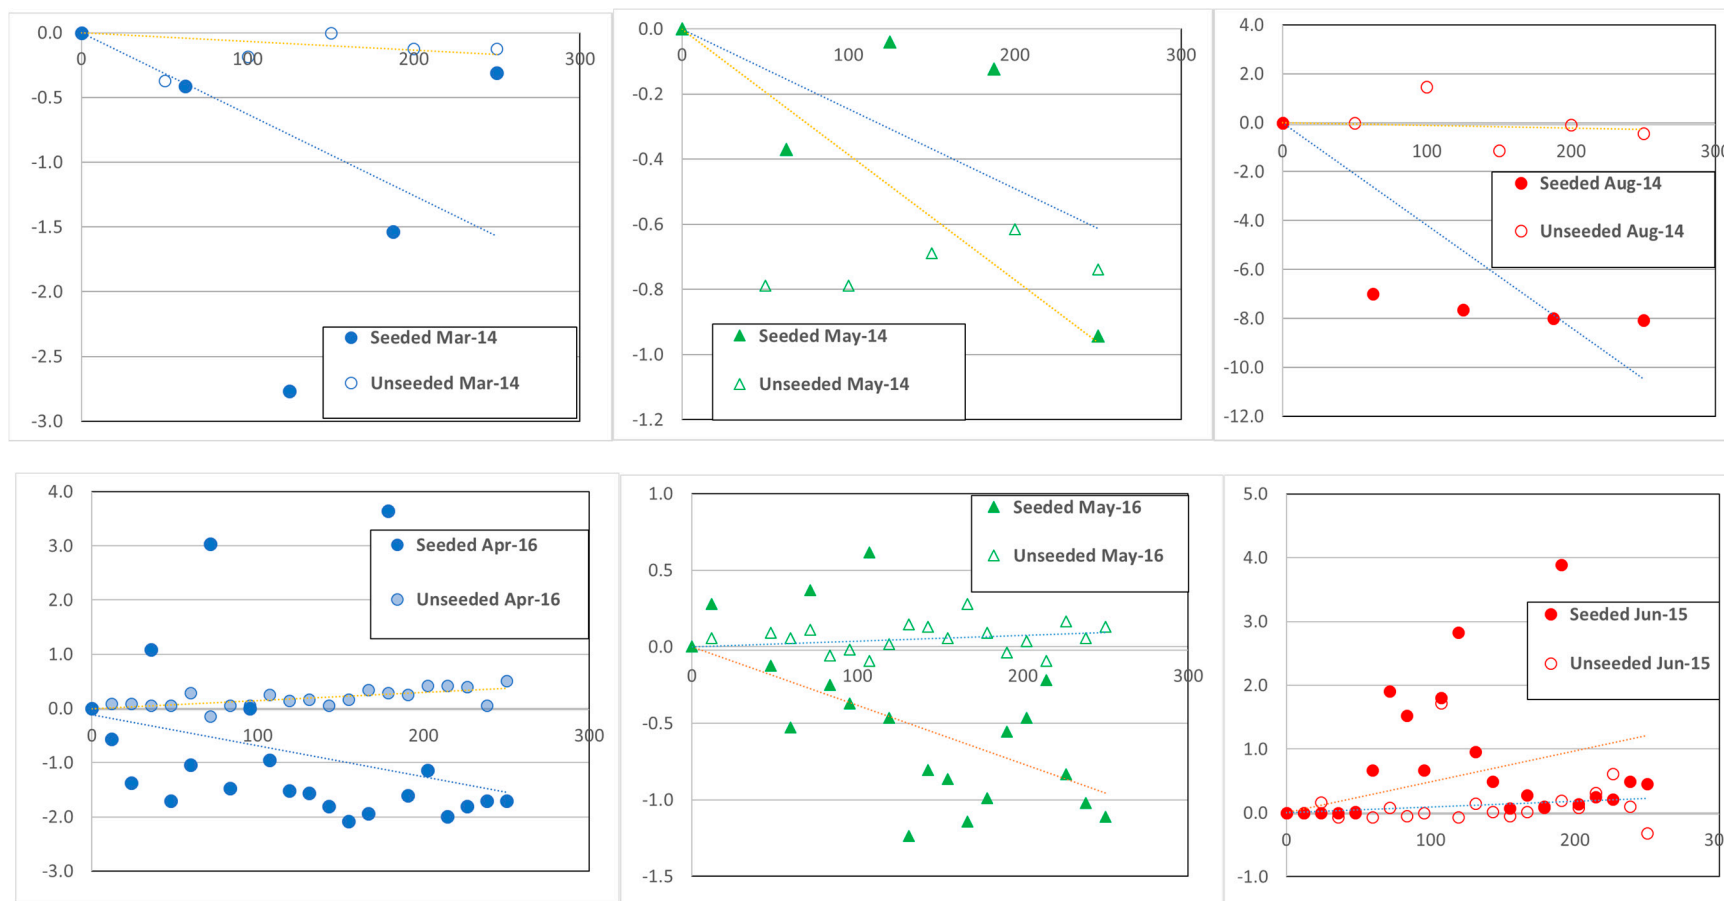

Supplementary data 1a. SRP load change along watercress seeded and unseeded ditches from top end of ditch.

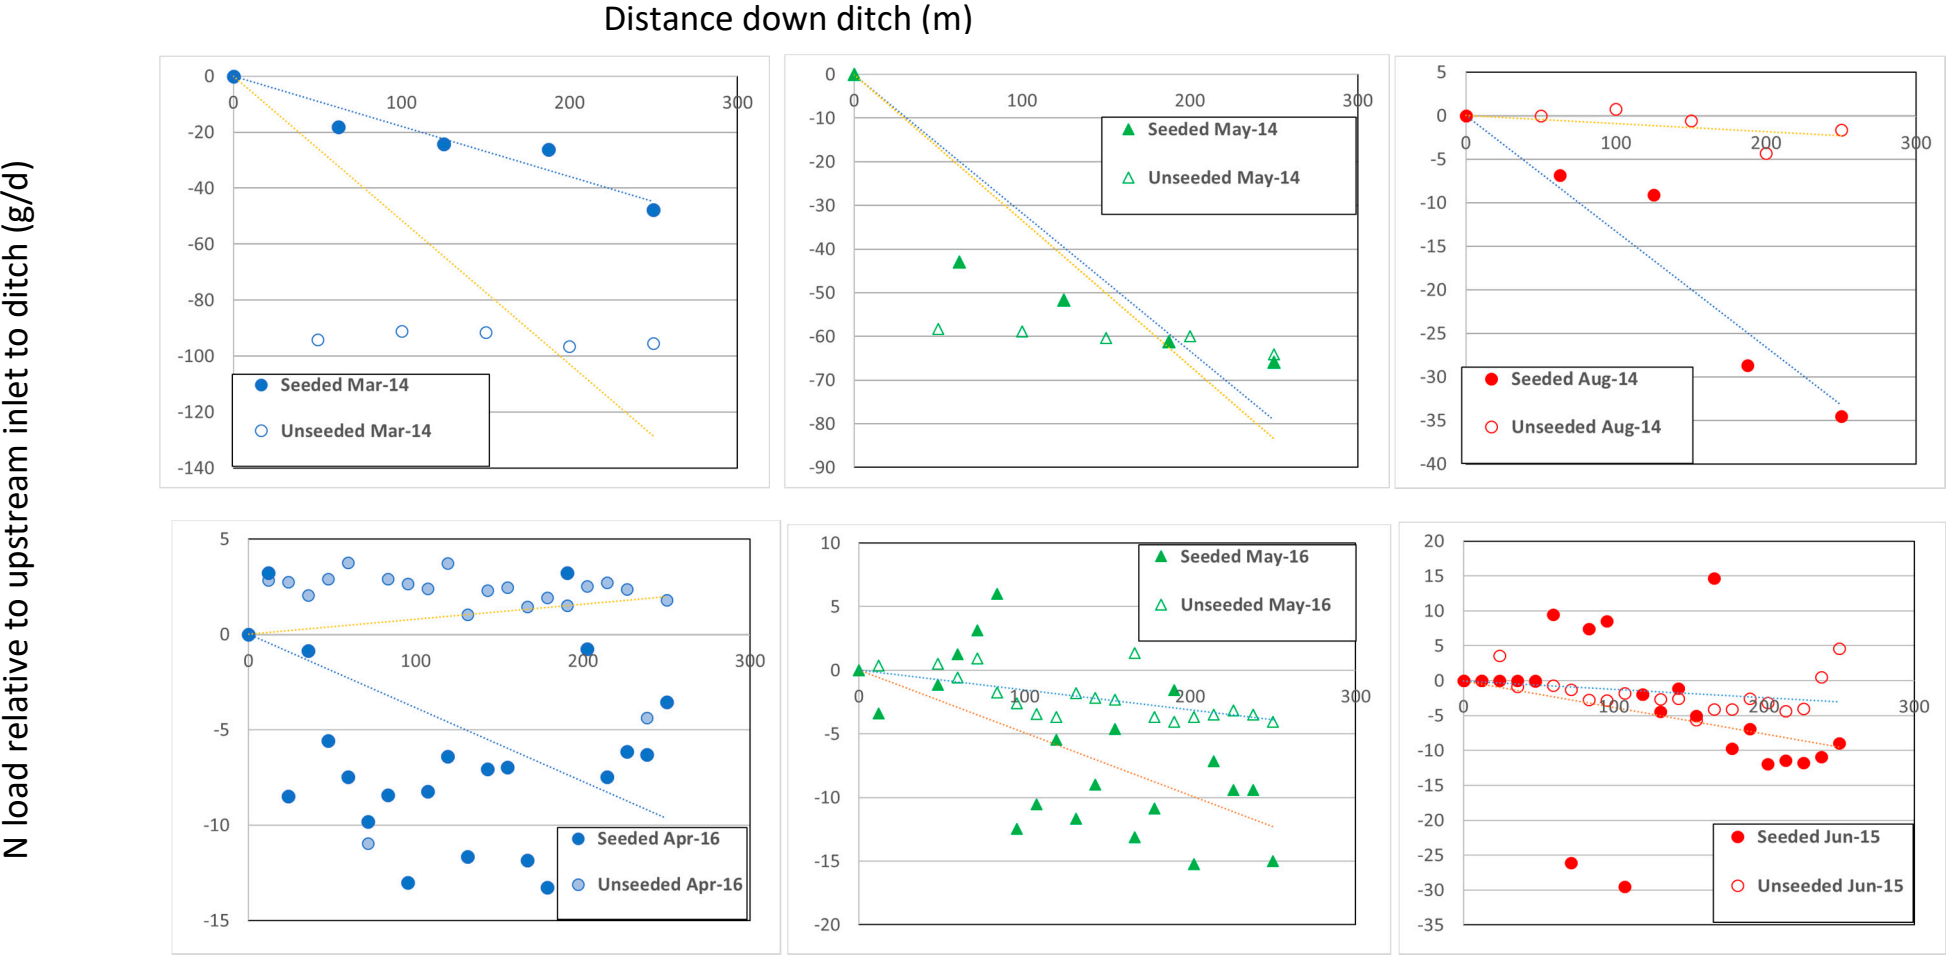

Supplementary data 1b. NO<sub>3</sub>-N load change along watercress seeded and unseeded ditches from top end of ditch.

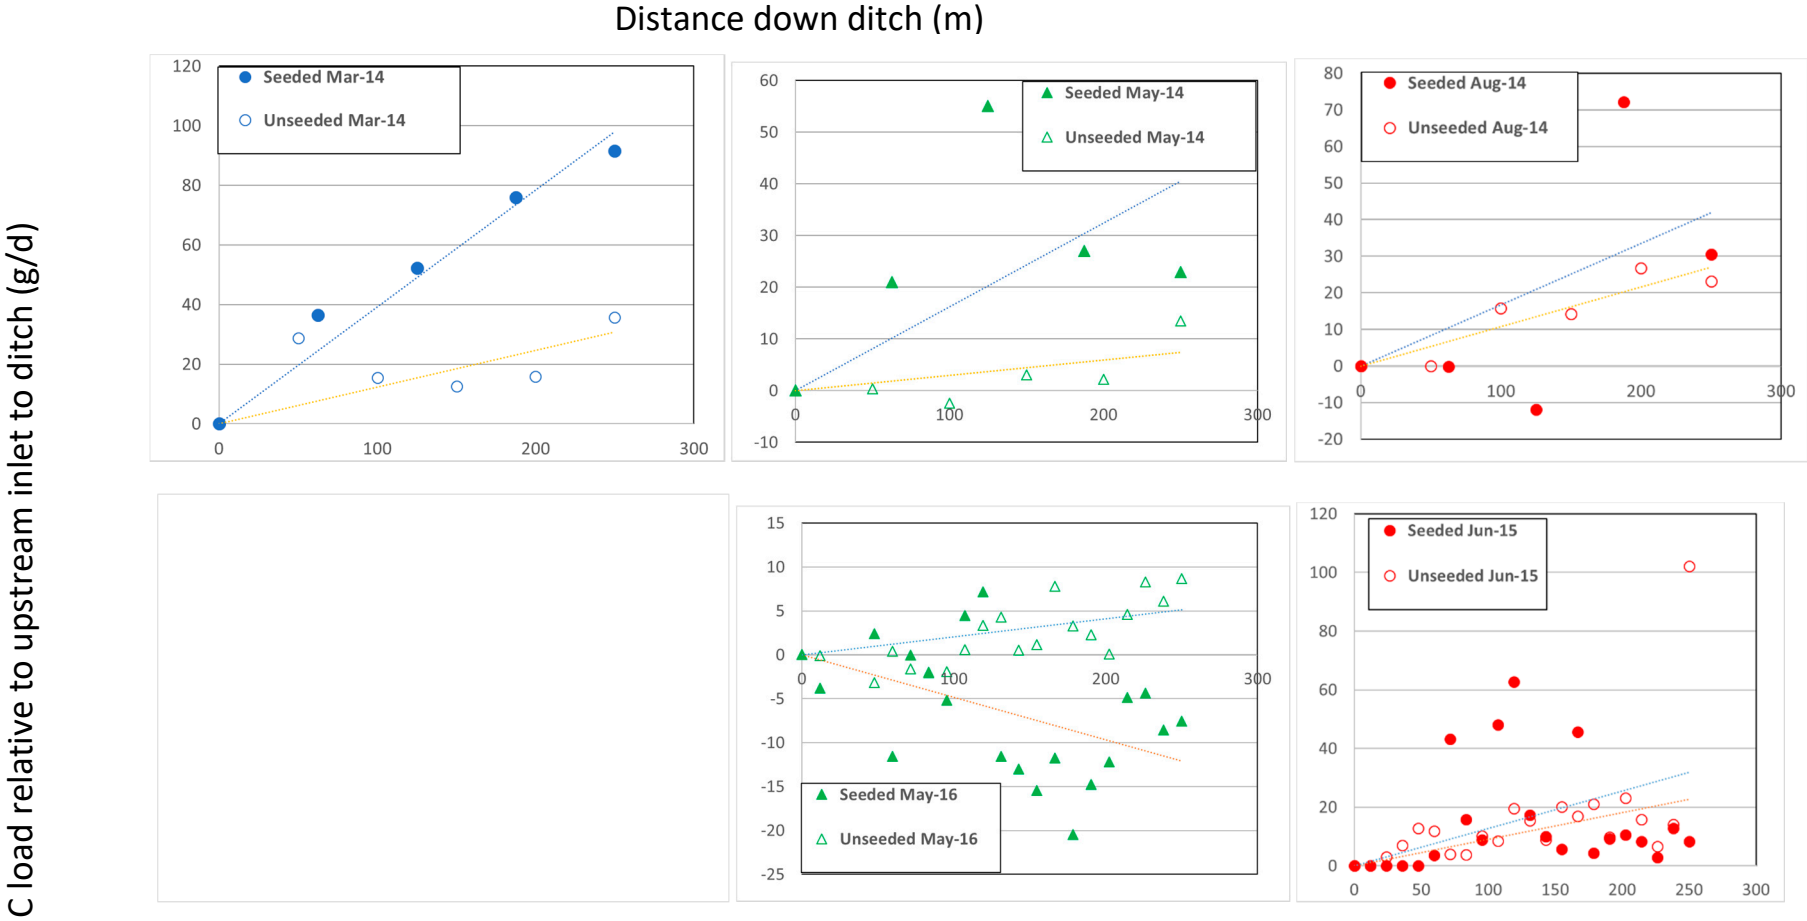

Supplementary data 1c. TOC load change along watercress seeded and unseeded ditches from top end of ditch.



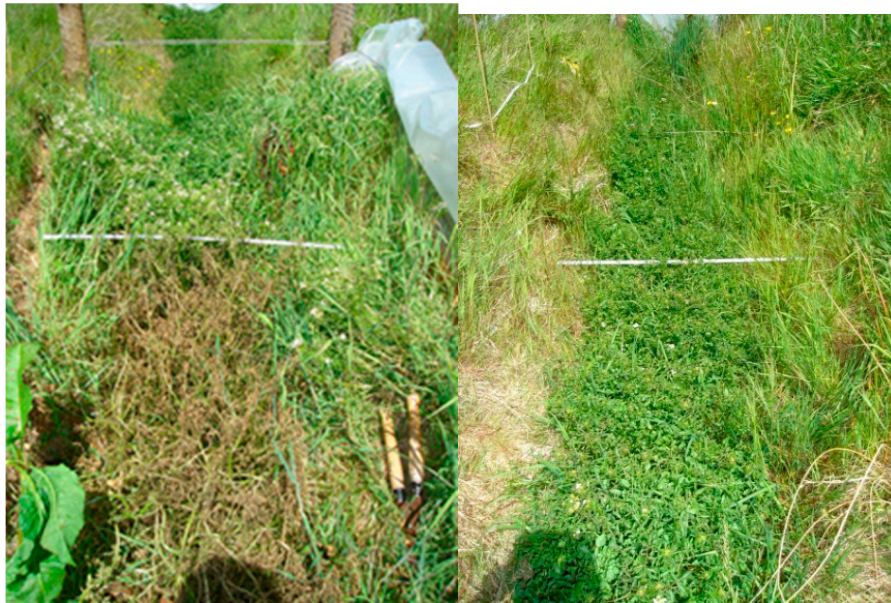

**Supplementary information 2a. Seeded covered and seeded uncovered sections, 10 June 2015**

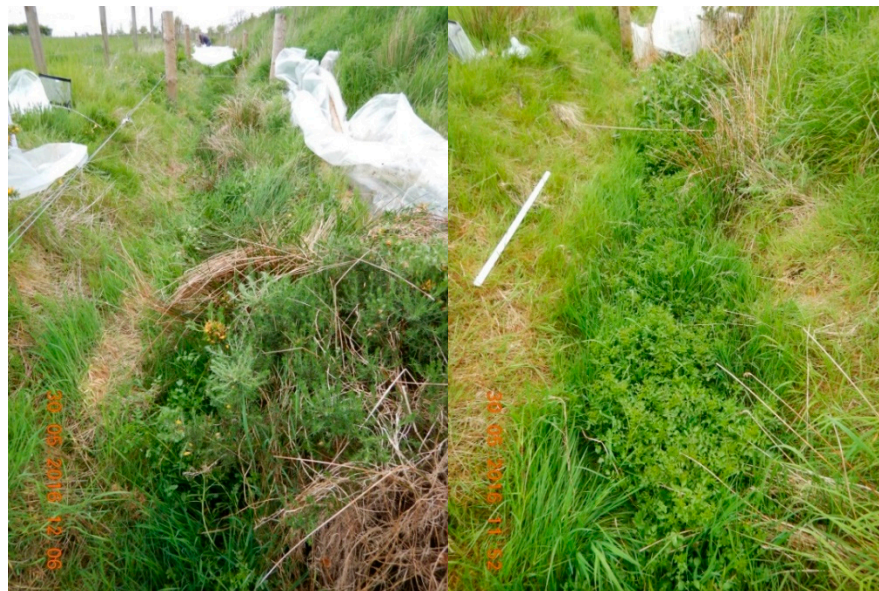

**Supplementary information 2b. Section 2 seeded covered and seeded uncovered sections, 30 may 2016**

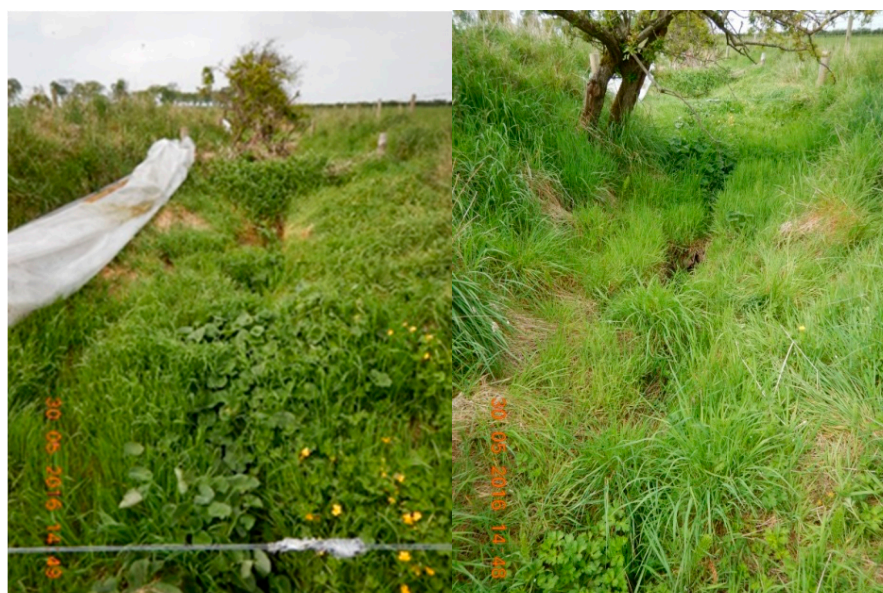

Supplement: s1 [file s1]
